# Supplementary material for: Clustering uncertain overlapping symptoms of multiple diseases in clinical diagnosis
Source: PeerJ Comput Sci. 2024 Oct 2;10:e2315. doi: 10.7717/peerj-cs.2315 (PMC11623175; doi:10.7717/peerj-cs.2315)
Supplement: Supplemental Information 1 — There are a number of symptoms occurred in disease Hepatitis B and C, the symptom with value 1 means it has been occurred in that disease and 0 means it has not occurred in that disease. [file peerj-cs-10-2315-s001.xlsx]

## Sheet: Sheet1
itching	fatigue	lethargy	yellowish_skin	dark_urine	nausea	loss_of_appetite	abdominal_pain	yellow_urine	yellowing_of_eyes	malaise	family_history	receiving_blood_transfusion	receiving_unsterile_injections	prognosis
1	1	1	1	1	0	1	1	1	1	1	0	1	1	Hepatitis B
1	1	1	1	1	0	1	1	1	1	1	0	1	1	Hepatitis B
0	1	1	1	1	0	1	1	1	1	1	0	1	1	Hepatitis B
1	0	1	1	1	0	1	1	1	1	1	0	1	1	Hepatitis B
1	1	0	1	1	0	1	1	1	1	1	0	1	1	Hepatitis B
1	1	1	0	1	0	1	1	1	1	1	0	1	1	Hepatitis B
1	1	1	1	0	0	1	1	1	1	1	0	1	1	Hepatitis B
1	1	1	1	1	0	0	1	1	1	1	0	1	1	Hepatitis B
1	1	1	1	1	0	1	0	1	1	1	0	1	1	Hepatitis B
1	1	1	1	1	0	1	1	0	1	1	0	1	1	Hepatitis B
0	1	0	1	0	1	1	0	0	0	0	1	0	0	Hepatitis C
0	1	0	1	0	1	1	0	0	1	0	1	0	0	Hepatitis C
0	0	0	1	0	1	1	0	0	1	0	1	0	0	Hepatitis C
0	1	0	0	0	1	1	0	0	1	0	1	0	0	Hepatitis C
0	1	0	1	0	0	1	0	0	1	0	1	0	0	Hepatitis C
0	1	0	1	0	1	0	0	0	1	0	1	0	0	Hepatitis C
0	1	0	1	0	1	1	0	0	0	0	1	0	0	Hepatitis C
0	1	0	1	0	1	1	0	0	1	0	0	0	0	Hepatitis C
0	1	0	1	0	1	1	0	0	1	0	1	0	0	Hepatitis C
0	1	0	1	0	1	1	0	0	1	0	1	0	0	Hepatitis C
1	1	1	1	1	0	1	1	1	1	1	0	1	1	Hepatitis B
1	1	1	1	1	0	1	1	1	1	1	0	1	1	Hepatitis B
0	1	1	1	1	0	1	1	1	1	1	0	1	1	Hepatitis B
1	0	1	1	1	0	1	1	1	1	1	0	1	1	Hepatitis B
1	1	0	1	1	0	1	1	1	1	1	0	1	1	Hepatitis B
1	1	1	0	1	0	1	1	1	1	1	0	1	1	Hepatitis B
1	1	1	1	0	0	1	1	1	1	1	0	1	1	Hepatitis B
1	1	1	1	1	0	0	1	1	1	1	0	1	1	Hepatitis B
1	1	1	1	1	0	1	0	1	1	1	0	1	1	Hepatitis B
1	1	1	1	1	0	1	1	0	1	1	0	1	1	Hepatitis B
0	1	0	1	0	1	1	0	0	0	0	1	0	0	Hepatitis C
0	1	0	1	0	1	1	0	0	1	0	1	0	0	Hepatitis C
0	0	0	1	0	1	1	0	0	1	0	1	0	0	Hepatitis C
0	1	0	0	0	1	1	0	0	1	0	1	0	0	Hepatitis C
0	1	0	1	0	0	1	0	0	1	0	1	0	0	Hepatitis C
0	1	0	1	0	1	0	0	0	1	0	1	0	0	Hepatitis C
0	1	0	1	0	1	1	0	0	0	0	1	0	0	Hepatitis C
0	1	0	1	0	1	1	0	0	1	0	0	0	0	Hepatitis C
0	1	0	1	0	1	1	0	0	1	0	1	0	0	Hepatitis C
0	1	0	1	0	1	1	0	0	1	0	1	0	0	Hepatitis C
1	1	1	1	1	0	1	1	1	1	1	0	1	1	Hepatitis B
1	1	1	1	1	0	1	1	1	1	1	0	1	1	Hepatitis B
0	1	1	1	1	0	1	1	1	1	1	0	1	1	Hepatitis B
1	0	1	1	1	0	1	1	1	1	1	0	1	1	Hepatitis B
1	1	0	1	1	0	1	1	1	1	1	0	1	1	Hepatitis B
1	1	1	0	1	0	1	1	1	1	1	0	1	1	Hepatitis B
1	1	1	1	0	0	1	1	1	1	1	0	1	1	Hepatitis B
1	1	1	1	1	0	0	1	1	1	1	0	1	1	Hepatitis B
1	1	1	1	1	0	1	0	1	1	1	0	1	1	Hepatitis B
1	1	1	1	1	0	1	1	0	1	1	0	1	1	Hepatitis B
0	1	0	1	0	1	1	0	0	0	0	1	0	0	Hepatitis C
0	1	0	1	0	1	1	0	0	1	0	1	0	0	Hepatitis C
0	0	0	1	0	1	1	0	0	1	0	1	0	0	Hepatitis C
0	1	0	0	0	1	1	0	0	1	0	1	0	0	Hepatitis C
0	1	0	1	0	0	1	0	0	1	0	1	0	0	Hepatitis C
0	1	0	1	0	1	0	0	0	1	0	1	0	0	Hepatitis C
0	1	0	1	0	1	1	0	0	0	0	1	0	0	Hepatitis C
0	1	0	1	0	1	1	0	0	1	0	0	0	0	Hepatitis C
0	1	0	1	0	1	1	0	0	1	0	1	0	0	Hepatitis C
0	1	0	1	0	1	1	0	0	1	0	1	0	0	Hepatitis C
1	1	1	1	1	0	1	1	1	1	1	0	1	1	Hepatitis B
1	1	1	1	1	0	1	1	1	1	1	0	1	1	Hepatitis B
0	1	1	1	1	0	1	1	1	1	1	0	1	1	Hepatitis B
1	0	1	1	1	0	1	1	1	1	1	0	1	1	Hepatitis B
1	1	0	1	1	0	1	1	1	1	1	0	1	1	Hepatitis B
1	1	1	0	1	0	1	1	1	1	1	0	1	1	Hepatitis B
1	1	1	1	0	0	1	1	1	1	1	0	1	1	Hepatitis B
1	1	1	1	1	0	0	1	1	1	1	0	1	1	Hepatitis B
1	1	1	1	1	0	1	0	1	1	1	0	1	1	Hepatitis B
1	1	1	1	1	0	1	1	0	1	1	0	1	1	Hepatitis B
0	1	0	1	0	1	1	0	0	0	0	1	0	0	Hepatitis C
0	1	0	1	0	1	1	0	0	1	0	1	0	0	Hepatitis C
0	0	0	1	0	1	1	0	0	1	0	1	0	0	Hepatitis C
0	1	0	0	0	1	1	0	0	1	0	1	0	0	Hepatitis C
0	1	0	1	0	0	1	0	0	1	0	1	0	0	Hepatitis C
0	1	0	1	0	1	0	0	0	1	0	1	0	0	Hepatitis C
0	1	0	1	0	1	1	0	0	0	0	1	0	0	Hepatitis C
0	1	0	1	0	1	1	0	0	1	0	0	0	0	Hepatitis C
0	1	0	1	0	1	1	0	0	1	0	1	0	0	Hepatitis C
0	1	0	1	0	1	1	0	0	1	0	1	0	0	Hepatitis C
1	1	1	1	1	0	1	1	1	1	1	0	1	1	Hepatitis B
1	1	1	1	1	0	1	1	1	1	1	0	1	1	Hepatitis B
0	1	1	1	1	0	1	1	1	1	1	0	1	1	Hepatitis B
1	0	1	1	1	0	1	1	1	1	1	0	1	1	Hepatitis B
1	1	0	1	1	0	1	1	1	1	1	0	1	1	Hepatitis B
1	1	1	0	1	0	1	1	1	1	1	0	1	1	Hepatitis B
1	1	1	1	0	0	1	1	1	1	1	0	1	1	Hepatitis B
1	1	1	1	1	0	0	1	1	1	1	0	1	1	Hepatitis B
1	1	1	1	1	0	1	0	1	1	1	0	1	1	Hepatitis B
1	1	1	1	1	0	1	1	0	1	1	0	1	1	Hepatitis B
0	1	0	1	0	1	1	0	0	0	0	1	0	0	Hepatitis C
0	1	0	1	0	1	1	0	0	1	0	1	0	0	Hepatitis C
0	0	0	1	0	1	1	0	0	1	0	1	0	0	Hepatitis C
0	1	0	0	0	1	1	0	0	1	0	1	0	0	Hepatitis C
0	1	0	1	0	0	1	0	0	1	0	1	0	0	Hepatitis C
0	1	0	1	0	1	0	0	0	1	0	1	0	0	Hepatitis C
0	1	0	1	0	1	1	0	0	0	0	1	0	0	Hepatitis C
0	1	0	1	0	1	1	0	0	1	0	0	0	0	Hepatitis C
0	1	0	1	0	1	1	0	0	1	0	1	0	0	Hepatitis C
0	1	0	1	0	1	1	0	0	1	0	1	0	0	Hepatitis C
1	1	1	1	1	0	1	1	1	1	1	0	1	1	Hepatitis B
1	1	1	1	1	0	1	1	1	1	1	0	1	1	Hepatitis B
0	1	1	1	1	0	1	1	1	1	1	0	1	1	Hepatitis B
1	0	1	1	1	0	1	1	1	1	1	0	1	1	Hepatitis B
1	1	0	1	1	0	1	1	1	1	1	0	1	1	Hepatitis B
1	1	1	0	1	0	1	1	1	1	1	0	1	1	Hepatitis B
1	1	1	1	0	0	1	1	1	1	1	0	1	1	Hepatitis B
1	1	1	1	1	0	0	1	1	1	1	0	1	1	Hepatitis B
1	1	1	1	1	0	1	0	1	1	1	0	1	1	Hepatitis B
1	1	1	1	1	0	1	1	0	1	1	0	1	1	Hepatitis B
0	1	0	1	0	1	1	0	0	0	0	1	0	0	Hepatitis C
0	1	0	1	0	1	1	0	0	1	0	1	0	0	Hepatitis C
0	0	0	1	0	1	1	0	0	1	0	1	0	0	Hepatitis C
0	1	0	0	0	1	1	0	0	1	0	1	0	0	Hepatitis C
0	1	0	1	0	0	1	0	0	1	0	1	0	0	Hepatitis C
0	1	0	1	0	1	0	0	0	1	0	1	0	0	Hepatitis C
0	1	0	1	0	1	1	0	0	0	0	1	0	0	Hepatitis C
0	1	0	1	0	1	1	0	0	1	0	0	0	0	Hepatitis C
0	1	0	1	0	1	1	0	0	1	0	1	0	0	Hepatitis C
0	1	0	1	0	1	1	0	0	1	0	1	0	0	Hepatitis C
1	1	1	1	1	0	1	1	1	1	1	0	1	1	Hepatitis B
0	1	0	1	0	1	1	0	0	1	0	1	0	0	Hepatitis C
1	1	1	1	1	0	1	1	1	1	1	0	1	1	Hepatitis B
0	1	0	1	0	1	1	0	0	1	0	1	0	0	Hepatitis C
1	1	1	1	1	0	1	1	1	1	1	0	1	1	Hepatitis B
0	1	0	1	0	1	1	0	0	1	0	1	0	0	Hepatitis C
1	1	1	1	1	0	1	1	1	1	1	0	1	1	Hepatitis B
0	1	0	1	0	1	1	0	0	1	0	1	0	0	Hepatitis C
1	1	1	1	1	0	1	1	1	1	1	0	1	1	Hepatitis B
0	1	0	1	0	1	1	0	0	1	0	1	0	0	Hepatitis C
1	1	1	1	1	0	1	1	1	1	1	0	1	1	Hepatitis B
0	1	0	1	0	1	1	0	0	1	0	1	0	0	Hepatitis C
1	1	1	1	1	0	1	1	1	1	1	0	1	1	Hepatitis B
0	1	0	1	0	1	1	0	0	1	0	1	0	0	Hepatitis C
1	1	1	1	1	0	1	1	1	1	1	0	1	1	Hepatitis B
0	1	0	1	0	1	1	0	0	1	0	1	0	0	Hepatitis C
1	1	1	1	1	0	1	1	1	1	1	0	1	1	Hepatitis B
0	1	0	1	0	1	1	0	0	1	0	1	0	0	Hepatitis C
1	1	1	1	1	0	1	1	1	1	1	0	1	1	Hepatitis B
0	1	0	1	0	1	1	0	0	1	0	1	0	0	Hepatitis C
1	1	1	1	1	0	1	1	1	1	1	0	1	1	Hepatitis B
0	1	0	1	0	1	1	0	0	1	0	1	0	0	Hepatitis C
1	1	1	1	1	0	1	1	1	1	1	0	1	1	Hepatitis B
0	1	0	1	0	1	1	0	0	1	0	1	0	0	Hepatitis C
1	1	1	1	1	0	1	1	1	1	1	0	1	1	Hepatitis B
0	1	0	1	0	1	1	0	0	1	0	1	0	0	Hepatitis C
1	1	1	1	1	0	1	1	1	1	1	0	1	1	Hepatitis B
0	1	0	1	0	1	1	0	0	1	0	1	0	0	Hepatitis C
1	1	1	1	1	0	1	1	1	1	1	0	1	1	Hepatitis B
0	1	0	1	0	1	1	0	0	1	0	1	0	0	Hepatitis C
1	1	1	1	1	0	1	1	1	1	1	0	1	1	Hepatitis B
0	1	0	1	0	1	1	0	0	1	0	1	0	0	Hepatitis C
1	1	1	1	1	0	1	1	1	1	1	0	1	1	Hepatitis B
0	1	0	1	0	1	1	0	0	1	0	1	0	0	Hepatitis C
1	1	1	1	1	0	1	1	1	1	1	0	1	1	Hepatitis B
0	1	0	1	0	1	1	0	0	1	0	1	0	0	Hepatitis C
1	1	1	1	1	0	1	1	1	1	1	0	1	1	Hepatitis B
0	1	0	1	0	1	1	0	0	1	0	1	0	0	Hepatitis C
1	1	1	1	1	0	1	1	1	1	1	0	1	1	Hepatitis B
0	1	0	1	0	1	1	0	0	1	0	1	0	0	Hepatitis C
1	1	1	1	1	0	1	1	1	1	1	0	1	1	Hepatitis B
0	1	0	1	0	1	1	0	0	1	0	1	0	0	Hepatitis C
1	1	1	1	1	0	1	1	1	1	1	0	1	1	Hepatitis B
0	1	0	1	0	1	1	0	0	1	0	1	0	0	Hepatitis C
1	1	1	1	1	0	1	1	1	1	1	0	1	1	Hepatitis B
0	1	0	1	0	1	1	0	0	1	0	1	0	0	Hepatitis C
1	1	1	1	1	0	1	1	1	1	1	0	1	1	Hepatitis B
0	1	0	1	0	1	1	0	0	1	0	1	0	0	Hepatitis C
1	1	1	1	1	0	1	1	1	1	1	0	1	1	Hepatitis B
0	1	0	1	0	1	1	0	0	1	0	1	0	0	Hepatitis C
1	1	1	1	1	0	1	1	1	1	1	0	1	1	Hepatitis B
0	1	0	1	0	1	1	0	0	1	0	1	0	0	Hepatitis C
1	1	1	1	1	0	1	1	1	1	1	0	1	1	Hepatitis B
0	1	0	1	0	1	1	0	0	1	0	1	0	0	Hepatitis C
1	1	1	1	1	0	1	1	1	1	1	0	1	1	Hepatitis B
0	1	0	1	0	1	1	0	0	1	0	1	0	0	Hepatitis C
1	1	1	1	1	0	1	1	1	1	1	0	1	1	Hepatitis B
0	1	0	1	0	1	1	0	0	1	0	1	0	0	Hepatitis C
1	1	1	1	1	0	1	1	1	1	1	0	1	1	Hepatitis B
0	1	0	1	0	1	1	0	0	1	0	1	0	0	Hepatitis C
1	1	1	1	1	0	1	1	1	1	1	0	1	1	Hepatitis B
0	1	0	1	0	1	1	0	0	1	0	1	0	0	Hepatitis C
1	1	1	1	1	0	1	1	1	1	1	0	1	1	Hepatitis B
0	1	0	1	0	1	1	0	0	1	0	1	0	0	Hepatitis C
1	1	1	1	1	0	1	1	1	1	1	0	1	1	Hepatitis B
0	1	0	1	0	1	1	0	0	1	0	1	0	0	Hepatitis C
1	1	1	1	1	0	1	1	1	1	1	0	1	1	Hepatitis B
0	1	0	1	0	1	1	0	0	1	0	1	0	0	Hepatitis C
1	1	1	1	1	0	1	1	1	1	1	0	1	1	Hepatitis B
0	1	0	1	0	1	1	0	0	1	0	1	0	0	Hepatitis C
1	1	1	1	1	0	1	1	1	1	1	0	1	1	Hepatitis B
0	1	0	1	0	1	1	0	0	1	0	1	0	0	Hepatitis C
1	1	1	1	1	0	1	1	1	1	1	0	1	1	Hepatitis B
0	1	0	1	0	1	1	0	0	1	0	1	0	0	Hepatitis C
1	1	1	1	1	0	1	1	1	1	1	0	1	1	Hepatitis B
0	1	0	1	0	1	1	0	0	1	0	1	0	0	Hepatitis C
1	1	1	1	1	0	1	1	1	1	1	0	1	1	Hepatitis B
0	1	0	1	0	1	1	0	0	1	0	1	0	0	Hepatitis C
1	1	1	1	1	0	1	1	1	1	1	0	1	1	Hepatitis B
0	1	0	1	0	1	1	0	0	1	0	1	0	0	Hepatitis C
1	1	1	1	1	0	1	1	1	1	1	0	1	1	Hepatitis B
0	1	0	1	0	1	1	0	0	1	0	1	0	0	Hepatitis C
1	1	1	1	1	0	1	1	1	1	1	0	1	1	Hepatitis B
0	1	0	1	0	1	1	0	0	1	0	1	0	0	Hepatitis C
1	1	1	1	1	0	1	1	1	1	1	0	1	1	Hepatitis B
0	1	0	1	0	1	1	0	0	1	0	1	0	0	Hepatitis C
1	1	1	1	1	0	1	1	1	1	1	0	1	1	Hepatitis B
0	1	0	1	0	1	1	0	0	1	0	1	0	0	Hepatitis C
1	1	1	1	1	0	1	1	1	1	1	0	1	1	Hepatitis B
0	1	0	1	0	1	1	0	0	1	0	1	0	0	Hepatitis C
1	1	1	1	1	0	1	1	1	1	1	0	1	1	Hepatitis B
0	1	0	1	0	1	1	0	0	1	0	1	0	0	Hepatitis C
1	1	1	1	1	0	1	1	1	1	1	0	1	1	Hepatitis B
0	1	0	1	0	1	1	0	0	1	0	1	0	0	Hepatitis C
1	1	1	1	1	0	1	1	1	1	1	0	1	1	Hepatitis B
0	1	0	1	0	1	1	0	0	1	0	1	0	0	Hepatitis C
1	1	1	1	1	0	1	1	1	1	1	0	1	1	Hepatitis B
0	1	0	1	0	1	1	0	0	1	0	1	0	0	Hepatitis C
1	1	1	1	1	0	1	1	1	1	1	0	1	1	Hepatitis B
0	1	0	1	0	1	1	0	0	1	0	1	0	0	Hepatitis C
1	1	1	1	1	0	1	1	1	1	1	0	1	1	Hepatitis B
0	1	0	1	0	1	1	0	0	1	0	1	0	0	Hepatitis C
1	1	1	1	1	0	1	1	1	1	1	0	1	1	Hepatitis B
0	1	0	1	0	1	1	0	0	1	0	1	0	0	Hepatitis C
1	1	1	1	1	0	1	1	1	1	1	0	1	1	Hepatitis B
0	1	0	1	0	1	1	0	0	1	0	1	0	0	Hepatitis C
1	1	1	1	1	0	1	1	1	1	1	0	1	1	Hepatitis B
0	1	0	1	0	1	1	0	0	1	0	1	0	0	Hepatitis C
1	1	1	1	1	0	1	1	1	1	1	0	1	1	Hepatitis B
0	1	0	1	0	1	1	0	0	1	0	1	0	0	Hepatitis C
1	1	1	1	1	0	1	1	1	1	1	0	1	1	Hepatitis B
0	1	0	1	0	1	1	0	0	1	0	1	0	0	Hepatitis C
1	1	1	1	1	0	1	1	1	1	1	0	1	1	Hepatitis B
0	1	0	1	0	1	1	0	0	1	0	1	0	0	Hepatitis C
1	1	1	1	1	0	1	1	1	1	1	0	1	1	Hepatitis B
0	1	0	1	0	1	1	0	0	1	0	1	0	0	Hepatitis C
1	1	1	1	1	0	1	1	1	1	1	0	1	1	Hepatitis B
0	1	0	1	0	1	1	0	0	1	0	1	0	0	Hepatitis C
1	1	1	1	1	0	1	1	1	1	1	0	1	1	Hepatitis B
0	1	0	1	0	1	1	0	0	1	0	1	0	0	Hepatitis C
